# Supplementary material for: Prediction of breast cancer molecular subtypes using radiomics signatures of synthetic mammography from digital breast tomosynthesis
Source: PubMed Central journal article supplement (PMC7726048; doi:10.1038/s41598-020-78681-9), 2020-12-09

**Prediction of breast cancer molecular subtypes using radiomics signatures of synthetic  
mammography from digital breast tomosynthesis**

Jinwoo Son, MD, Si Eun Lee, MD, Eun-Kyung Kim, MD, PhD, Sungwon Kim, MD

**Supplementary Table 1.** List of all features included in this study.

| Class              | Features                    | Class                           | Features                         |       |                                  |
|--------------------|-----------------------------|---------------------------------|----------------------------------|-------|----------------------------------|
| First order        | 10Percentile                | GLRLM                           | GrayLevelNonUniformity           |       |                                  |
|                    | 90Percentile                |                                 | GrayLevelNonUniformityNormalized |       |                                  |
|                    | Energy                      |                                 | GrayLevelVariance                |       |                                  |
|                    | Entropy                     |                                 | HighGrayLevelRunEmphasis         |       |                                  |
|                    | InterquartileRange          |                                 | LongRunEmphasis                  |       |                                  |
|                    | Kurtosis                    |                                 | LongRunHighGrayLevelEmphasis     |       |                                  |
|                    | Maximum                     |                                 | LongRunLowGrayLevelEmphasis      |       |                                  |
|                    | MeanAbsoluteDeviation       |                                 | LowGrayLevelRunEmphasis          |       |                                  |
|                    | Mean                        |                                 | RunEntropy                       |       |                                  |
|                    | Median                      |                                 | RunLengthNonUniformity           |       |                                  |
|                    | Minimum                     |                                 | RunLengthNonUniformityNormalized |       |                                  |
|                    | Range                       |                                 | RunPercentage                    |       |                                  |
|                    | RobustMeanAbsoluteDeviation |                                 | RunVariance                      |       |                                  |
|                    | RootMeanSquared             |                                 | ShortRunEmphasis                 |       |                                  |
|                    | Skewness                    |                                 | ShortRunHighGrayLevelEmphasis    |       |                                  |
|                    | TotalEnergy                 |                                 | ShortRunLowGrayLevelEmphasis     |       |                                  |
|                    | Uniformity                  |                                 |                                  |       |                                  |
|                    | Variance                    |                                 |                                  |       |                                  |
|                    | GLCM                        |                                 | Autocorrelation                  | GLSZM | GrayLevelNonUniformity           |
|                    |                             |                                 | JointAverage                     |       | GrayLevelNonUniformityNormalized |
| ClusterProinence   |                             | GrayLevelVariance               |                                  |       |                                  |
| ClusterShade       |                             | HighGrayLevelZoneEmphasis       |                                  |       |                                  |
| ClusterTendency    |                             | LargeAreaEmphasis               |                                  |       |                                  |
| Contrast           |                             | LargeAreaHighGrayLevelEmphasis  |                                  |       |                                  |
| Correlation        |                             | LargeAreaLowGrayLevelEmphasis   |                                  |       |                                  |
| DifferenceAverage  |                             | LowGrayLevelZoneEmphasis        |                                  |       |                                  |
| DifferenceEntropy  |                             | SizeZoneNonUniformity           |                                  |       |                                  |
| DifferenceVariance |                             | SizeZoneNonUniformityNormalized |                                  |       |                                  |
| JointEnergy        |                             | SmallAreaEmphasis               |                                  |       |                                  |
| JointEntropy       |                             | SmallAreaHighGrayLevelEmphasis  |                                  |       |                                  |
| Imc1               |                             | SmallAreaLowGrayLevelEmphasis   |                                  |       |                                  |
| Imc2               |                             | ZoneEntropy                     |                                  |       |                                  |
| Idm                |                             | ZonePercentage                  |                                  |       |                                  |
| Idmn               |                             | ZoneVariance                    |                                  |       |                                  |
| Id                 |                             |                                 |                                  |       |                                  |
| Idn                |                             |                                 |                                  |       |                                  |
| InverseVariance    |                             |                                 |                                  |       |                                  |
| MaximumProbability |                             |                                 |                                  |       |                                  |
| SumEntropy         |                             |                                 |                                  |       |                                  |
| SumSquares         |                             |                                 |                                  |       |                                  |

GLCM: gray-level co-occurrence matrix, GLRLM: grey-level run length matrix, GLSZM: gray-level size zone matrix

**Supplementary Table 2.** Lesion size, shape and receptor expression of breast cancers

|                   | TN                     |                          |         | HER2                   |                         |         | Luminal                |                          |         |
|-------------------|------------------------|--------------------------|---------|------------------------|-------------------------|---------|------------------------|--------------------------|---------|
|                   | Training set<br>(N=50) | Validation set<br>(N=12) | P value | Training set<br>(N=50) | Validation set<br>(N=9) | P value | Training set<br>(N=50) | Validation set<br>(N=50) | P value |
| Lesion size (mm)* | 33.98 ±<br>17.45       | 29.47 ±<br>15.04         | 0.894   | 41.78 ±<br>19.55       | 28.33 ±<br>10.17        | 0.050   | 24.92 ±<br>14.41       | 28.68 ±<br>14.12         | 0.191   |
| Lesion shape      |                        |                          | 0.421   |                        |                         | 0.012   |                        |                          | 0.176   |
| Oval              | 3                      | 1                        |         | 1                      | 3                       |         | 3                      | 5                        |         |
| Round             | 17                     | 2                        |         | 4                      | 1                       |         | 8                      | 4                        |         |
| Irregular         | 30                     | 9                        |         | 41                     | 4                       |         | 36                     | 41                       |         |
| Non-mass          | 0                      | 0                        |         | 4                      | 1                       |         | 3                      | 0                        |         |
| ER (percentage)*  | 0                      | 0                        | 1.000   | 0                      | 0                       | 1.000   | 85.34 ±<br>24.40       | 82.40 ±<br>26.46         | 0.761   |
| PR (percentage)*  | 0                      | 0                        | 1.000   | 0                      | 0                       | 1.000   | 46.14 ±<br>40.80       | 50.48 ±<br>38.60         | 0.556   |
| HER2              |                        |                          | 1.000   |                        |                         | 1.000   |                        |                          | 0.627   |
| 0                 | 25                     | 6                        |         | 0                      | 0                       |         | 5                      | 8                        |         |
| 1+                | 14                     | 3                        |         | 0                      | 0                       |         | 20                     | 15                       |         |
| 2+                | 11                     | 3                        |         | 10                     | 2                       |         | 21                     | 24                       |         |
| 3+                | 0                      | 0                        |         | 40                     | 7                       |         | 4                      | 3                        |         |

\* means ± standard deviations

ER: estrogen receptor, PR: progesterone receptor, HER2: human epidermal growth factor receptor 2

**Supplementary Table 3.** List of features selected for each radiomics model

| Prediction             | Selected features                                                                                                                                                                                                                                                                                                                                                                                                                                                                                                                                                                                                                                                                                                                                                                                                                                                                                                                                                                                                                                                                                                                                                                                                                                                               |
|------------------------|---------------------------------------------------------------------------------------------------------------------------------------------------------------------------------------------------------------------------------------------------------------------------------------------------------------------------------------------------------------------------------------------------------------------------------------------------------------------------------------------------------------------------------------------------------------------------------------------------------------------------------------------------------------------------------------------------------------------------------------------------------------------------------------------------------------------------------------------------------------------------------------------------------------------------------------------------------------------------------------------------------------------------------------------------------------------------------------------------------------------------------------------------------------------------------------------------------------------------------------------------------------------------------|
| TN vs non-TN           | MLO_firstorder_10Percentile<br>MLO_firstorder_Entropy<br>MLO_firstorder_MeanAbsoluteDeviation<br>MLO_glm_SumEntropy<br>MLO_glrml_GrayLevelNonUniformityNormalized<br>MLO_glrml_RunEntropy<br>MLO_glszm_GrayLevelNonUniformityNormalized<br>CC_firstorder_10Percentile<br>CC_firstorder_Entropy<br>CC_firstorder_MeanAbsoluteDeviation<br>CC_firstorder_Median<br>CC_firstorder_Minimum<br>CC_firstorder_Uniformity<br>CC_firstorder_Variance<br>CC_glm_ClusterTendency<br>CC_glm_SumSquares<br>CC_glrml_GrayLevelNonUniformityNormalized<br>CC_glrml_GrayLevelVariance<br>CC_glszm_GrayLevelNonUniformityNormalized<br>CC_glszm_GrayLevelVariance                                                                                                                                                                                                                                                                                                                                                                                                                                                                                                                                                                                                                               |
| HER2 vs non-HER2       | MLO_firstorder_InterquartileRange<br>MLO_firstorder_Kurtosis<br>MLO_firstorder_Minimum<br>MLO_firstorder_RobustMeanAbsoluteDeviation<br>MLO_glm_ClusterProminence<br>MLO_glm_Idn<br>MLO_glszm_GrayLevelNonUniformityNormalized<br>MLO_glszm_LargeAreaHighGrayLevelEmphasis<br>MLO_glszm_LowGrayLevelZoneEmphasis<br>MLO_glszm_SizeZoneNonUniformity<br>MLO_glszm_ZoneEntropy<br>CC_firstorder_Kurtosis<br>CC_firstorder_Minimum<br>CC_glm_JointAverage<br>CC_glm_ClusterTendency<br>CC_glm_Imc2<br>CC_glszm_LargeAreaEmphasis<br>CC_glszm_SizeZoneNonUniformity                                                                                                                                                                                                                                                                                                                                                                                                                                                                                                                                                                                                                                                                                                                 |
| Luminal vs non-luminal | MLO_firstorder_10Percentile<br>MLO_firstorder_Entropy<br>MLO_firstorder_InterquartileRange<br>MLO_firstorder_Kurtosis<br>MLO_firstorder_Mean<br>MLO_firstorder_Range<br>MLO_firstorder_RootMeanSquared<br>MLO_firstorder_Skewness<br>MLO_firstorder_Variance<br>MLO_glm_JointAverage<br>MLO_glm_ClusterShade<br>MLO_glm_ClusterTendency<br>MLO_glm_DifferenceVariance<br>MLO_glm_Idm<br>MLO_glm_Idmn<br>MLO_glm_Id<br>MLO_glm_InverseVariance<br>MLO_glm_SumEntropy<br>MLO_glm_SumSquares<br>MLO_glrml_GrayLevelNonUniformity<br>MLO_glrml_LongRunLowGrayLevelEmphasis<br>MLO_glrml_LowGrayLevelRunEmphasis<br>MLO_glrml_RunLengthNonUniformityNormalized<br>MLO_glrml_RunPercentage<br>MLO_glrml_ShortRunEmphasis<br>MLO_glrml_ShortRunLowGrayLevelEmphasis<br>MLO_glszm_HighGrayLevelZoneEmphasis<br>MLO_glszm_LargeAreaLowGrayLevelEmphasis<br>MLO_glszm_LowGrayLevelZoneEmphasis<br>MLO_glszm_SmallAreaHighGrayLevelEmphasis<br>MLO_glszm_SmallAreaLowGrayLevelEmphasis<br>MLO_glszm_ZoneEntropy<br>MLO_glszm_ZonePercentage<br>CC_firstorder_10Percentile<br>CC_firstorder_Entropy<br>CC_firstorder_Kurtosis<br>CC_firstorder_Maximum<br>CC_firstorder_MeanAbsoluteDeviation<br>CC_firstorder_Mean<br>CC_firstorder_Median<br>CC_firstorder_Minimum<br>CC_firstorder_Range |

---

CC\_firstorder\_RootMeanSquared  
CC\_firstorder\_Skewness  
CC\_firstorder\_Uniformity  
CC\_firstorder\_Variance  
CC\_glcmm\_Autocorrelation  
CC\_glcmm\_ClusterShade  
CC\_glcmm\_ClusterTendency  
CC\_glcmm\_Correlation  
CC\_glcmm\_Imc2  
CC\_glcmm\_SumSquares  
CC\_glrmm\_GrayLevelNonUniformity  
CC\_glrmm\_GrayLevelNonUniformityNormalized  
CC\_glrmm\_GrayLevelVariance  
CC\_glrmm\_HighGrayLevelRunEmphasis  
CC\_glrmm\_RunLengthNonUniformity  
CC\_glrmm\_ShortRunHighGrayLevelEmphasis  
CC\_glszm\_GrayLevelNonUniformity  
CC\_glszm\_HighGrayLevelZoneEmphasis  
CC\_glszm\_LargeAreaEmphasis  
CC\_glszm\_LargeAreaHighGrayLevelEmphasis  
CC\_glszm\_SizeZoneNonUniformity  
CC\_glszm\_SmallAreaEmphasis  
CC\_glszm\_SmallAreaHighGrayLevelEmphasis  
CC\_glszm\_ZoneVariance

---

CC: craniocaudal, MLO: mediolateral oblique, GLCM: gray-level co-occurrence matrix, GLRLM:

grey-level run length matrix, GLSZM: gray-level size zone matrix

**Supplementary Table 4.** Univariate and multivariate logistic regression of the clinical model and combined model for the HER2 subtype of breast cancer.

| Feature                           | Univariate analysis |               |         |                       | Multivariate analysis |                       | With the radiomics signature |                      |
|-----------------------------------|---------------------|---------------|---------|-----------------------|-----------------------|-----------------------|------------------------------|----------------------|
|                                   | HER2                | Non-HER2      | P value | Odds ratio            | P value               | Odds ratio            | P value                      | Odds ratio           |
| Age                               | 52.70 ± 8.510       | 54.87 ± 10.69 | 0.213   | 0.978 (0.944, 1.012)  |                       |                       |                              |                      |
| Size                              | 41.78 ± 19.55       | 29.45 ± 16.56 | <0.001  | 1.037 (1.018, 1.059)  | 0.036                 | 1.024 (1.002, 1.048)  | 0.382                        | 0.987 (0.956, 1.016) |
| <b>Breast composition</b>         |                     |               |         |                       |                       |                       |                              |                      |
| Dense                             | 41                  | 70            | Ref     | 1                     |                       |                       |                              |                      |
| Fatty                             | 9                   | 30            | 0.118   | 0.512 (0.211, 1.149)  |                       |                       |                              |                      |
| <b>Gross features</b>             |                     |               |         |                       |                       |                       |                              |                      |
| Mass only                         | 16                  | 59            | Ref     | 1                     |                       |                       |                              |                      |
| Mass + calcification              | 30                  | 38            | 0.004   | 2.911 (1.418, 6.157)  | 0.991                 | NA                    | 0.993                        | NA                   |
| Calcification only                | 4                   | 3             | 0.050   | 4.917 (0.990, 27.170) |                       |                       |                              |                      |
| <b>Shape</b>                      |                     |               |         |                       |                       |                       |                              |                      |
| Oval                              | 1                   | 6             | 0.231   | 0.268 (0.014, 1.648)  |                       |                       |                              |                      |
| Round                             | 4                   | 25            | 0.018   | 0.258 (0.072, 0.722)  | 0.081                 | 0.352 (0.095, 1.047)  | 0.033                        | 0.208 (0.042, 0.795) |
| Irregular                         | 41                  | 66            | Ref     | 1                     |                       |                       |                              |                      |
| <b>Mass margin</b>                |                     |               |         |                       |                       |                       |                              |                      |
| Obscured                          | 12                  | 16            | 0.515   | 1.339 (0.548, 3.225)  |                       |                       |                              |                      |
| Microlobulated                    | 3                   | 13            | 0.194   | 0.412 (0.089, 1.412)  |                       |                       |                              |                      |
| Indistinct                        | 28                  | 50            | Ref     | 1                     |                       |                       |                              |                      |
| Spiculated                        | 3                   | 18            | 0.069   | 0.298 (0.066, 0.977)  |                       |                       |                              |                      |
| <b>Mass density</b>               |                     |               |         |                       |                       |                       |                              |                      |
| Low                               | 1                   | 9             | 0.102   | 0.172 (0.009, 0.977)  |                       |                       |                              |                      |
| Equal                             | 33                  | 51            | Ref     | 1                     |                       |                       |                              |                      |
| High                              | 12                  | 37            | 0.084   | 0.501 (0.222, 1.079)  |                       |                       |                              |                      |
| Architectural distortion          | 7                   | 23            | 0.198   | 0.545 (0.202, 1.318)  |                       |                       |                              |                      |
| <b>Calcification morphology</b>   |                     |               |         |                       |                       |                       |                              |                      |
| Benign                            | 0                   | 2             | 0.988   | NA                    |                       |                       |                              |                      |
| Amorphous                         | 1                   | 3             | 0.541   | 0.481 (0.023, 4.107)  |                       |                       |                              |                      |
| Coarse heterogeneous              | 3                   | 5             | 0.857   | 0.867 (0.161, 3.995)  |                       |                       |                              |                      |
| Fine pleomorphic                  | 18                  | 26            | Ref     | 1                     |                       |                       |                              |                      |
| Fine linear branching             | 13                  | 5             | 0.030   | 3.756 (1.192, 13.452) | 0.130                 | 2.707 (0.773, 10.604) | 0.371                        | 2.015 (0.447, 9.978) |
| <b>Calcification distribution</b> |                     |               |         |                       |                       |                       |                              |                      |
| Diffuse                           | 1                   | 0             | 0.995   | NA                    |                       |                       |                              |                      |
| Regional                          | 0                   | 4             | 0.989   | NA                    |                       |                       |                              |                      |
| Grouped                           | 5                   | 12            | 0.076   | 0.345 (0.098, 1.070)  |                       |                       |                              |                      |
| Linear                            | 0                   | 1             | 0.994   | NA                    |                       |                       |                              |                      |
| Segmental                         | 29                  | 24            | Ref     | 1                     |                       |                       |                              |                      |
| Radiomics signature               |                     |               | <0.001  | 283 (50, 2140)        |                       |                       | <0.001                       | 616 (61, 9168)       |

**Supplementary Table 5.** Univariate and multivariate logistic regression of the clinical model and combined model for the luminal subtype of breast cancer.

| Feature                           | Univariate analysis |               |         |                       | Multivariate analysis |                       | With radiomics signature |                       |
|-----------------------------------|---------------------|---------------|---------|-----------------------|-----------------------|-----------------------|--------------------------|-----------------------|
|                                   | Luminal             | Non-Luminal   | P value | Odds ratio            | P value               | Odds ratio            | P value                  | Odds ratio            |
| Age                               | 55.66 ± 10.95       | 53.39 ± 9.520 | 0.193   | 1.023 (0.989, 1.059)  |                       |                       |                          |                       |
| Size                              | 24.92 ± 14.41       | 37.88 ± 18.85 | <0.001  | 0.947 (0.919, 0.972)  | 0.002                 | 0.946 (0.191, 0.977)  | 0.864                    | 0.996 (0.946, 1.044)  |
| <b>Breast composition</b>         |                     |               |         |                       |                       |                       |                          |                       |
| Dense                             | 30                  | 81            | Ref     | 1                     |                       |                       |                          |                       |
| Fatty                             | 20                  | 19            | 0.007   | 2.842 (1.339, 6.098)  | 0.014                 | 3.289 (1.291, 8.708)  | 0.341                    | 1.996 (0.472, 8.487)  |
| <b>Gross feature</b>              |                     |               |         |                       |                       |                       |                          |                       |
| Mass only                         | 30                  | 45            | Ref     | 1                     |                       |                       |                          |                       |
| Mass + calcification              | 17                  | 51            | 0.058   | 0.500 (0.240, 1.015)  |                       |                       |                          |                       |
| Calcification only                | 3                   | 4             | 0.883   | 1.125 (0.209, 5.454)  |                       |                       |                          |                       |
| <b>Shape</b>                      |                     |               |         |                       |                       |                       |                          |                       |
| Oval                              | 3                   | 4             | 0.621   | 1.479 (0.279, 7.057)  |                       |                       |                          |                       |
| Round                             | 8                   | 21            | 0.537   | 0.751 (0.289, 1.809)  |                       |                       |                          |                       |
| Irregular                         | 36                  | 71            | Ref     | 1                     |                       |                       |                          |                       |
| <b>Mass margin</b>                |                     |               |         |                       |                       |                       |                          |                       |
| Obscured                          | 6                   | 22            | 0.487   | 0.694 (0.231, 1.861)  |                       |                       |                          |                       |
| Microlobulated                    | 6                   | 10            | 0.461   | 1.527 (0.471, 4.638)  |                       |                       |                          |                       |
| Indistinct                        | 22                  | 56            | Ref     | 1                     |                       |                       |                          |                       |
| Spiculated                        | 13                  | 8             | 0.006   | 4.136 (1.535, 11.794) | 0.244                 | 2.344 (0.544, 10.011) | 0.470                    | 2.243 (0.229, 2.045)  |
| <b>Mass density</b>               |                     |               |         |                       |                       |                       |                          |                       |
| Low                               | 6                   | 4             | 0.109   | 3.000 (0.793, 12.560) |                       |                       |                          |                       |
| Equal                             | 28                  | 56            | Ref     | 1                     |                       |                       |                          |                       |
| High                              | 13                  | 36            | 0.413   | 0.722 (0.324, 1.555)  |                       |                       |                          |                       |
| Architectural distortion          | 18                  | 12            | 0.001   | 4.125 (1.810, 9.724)  | 0.007                 | 5.577 (1.663, 20.503) | 0.266                    | 3.250 (0.448, 29.423) |
| <b>Calcification morphology</b>   |                     |               |         |                       |                       |                       |                          |                       |
| Benign                            | 1                   | 1             | 0.649   | 1.933 (0.073, 51.238) |                       |                       |                          |                       |
| Amorphous                         | 1                   | 3             | 0.714   | 0.644 (0.030, 5.538)  |                       |                       |                          |                       |
| Coarse heterogeneous              | 2                   | 6             | 0.616   | 0.644 (0.087, 3.204)  |                       |                       |                          |                       |
| Fine pleomorphic                  | 15                  | 29            | Ref     | 1                     |                       |                       |                          |                       |
| Fine linear branching             | 1                   | 17            | 0.044   | 0.114 (0.006, 0.640)  | 0.198                 | 0.167 (0.005, 1.688)  | 0.458                    | 0.298 (0.006, 4.625)  |
| <b>Calcification distribution</b> |                     |               |         |                       |                       |                       |                          |                       |
| Diffuse                           | 0                   | 1             | 0.992   | NA                    |                       |                       |                          |                       |
| Regional                          | 2                   | 2             | 0.169   | 4.300 (0.471, 39.595) |                       |                       |                          |                       |
| Grouped                           | 8                   | 9             | 0.025   | 3.822 (1.178, 12.664) | 0.443                 | 1.794 (0.403, 8.268)  | 0.166                    | 4.310 (0.578, 38.452) |
| Linear                            | 0                   | 1             | 0.992   | NA                    |                       |                       |                          |                       |
| Segmental                         | 10                  | 43            | Ref     | 1                     |                       |                       |                          |                       |
| Radiomics signature               |                     |               | <0.001  | 1536 (221, 17693)     |                       |                       | <0.001                   | 1673 (170, 3099)      |

**Supplementary Figure 1.** Interobserver reproducibility for each radiomics feature was shown with the intraclass coefficient (ICC) for the A. MLO view and B. CC view. An ICC > 0.75 was considered to indicate good agreement.

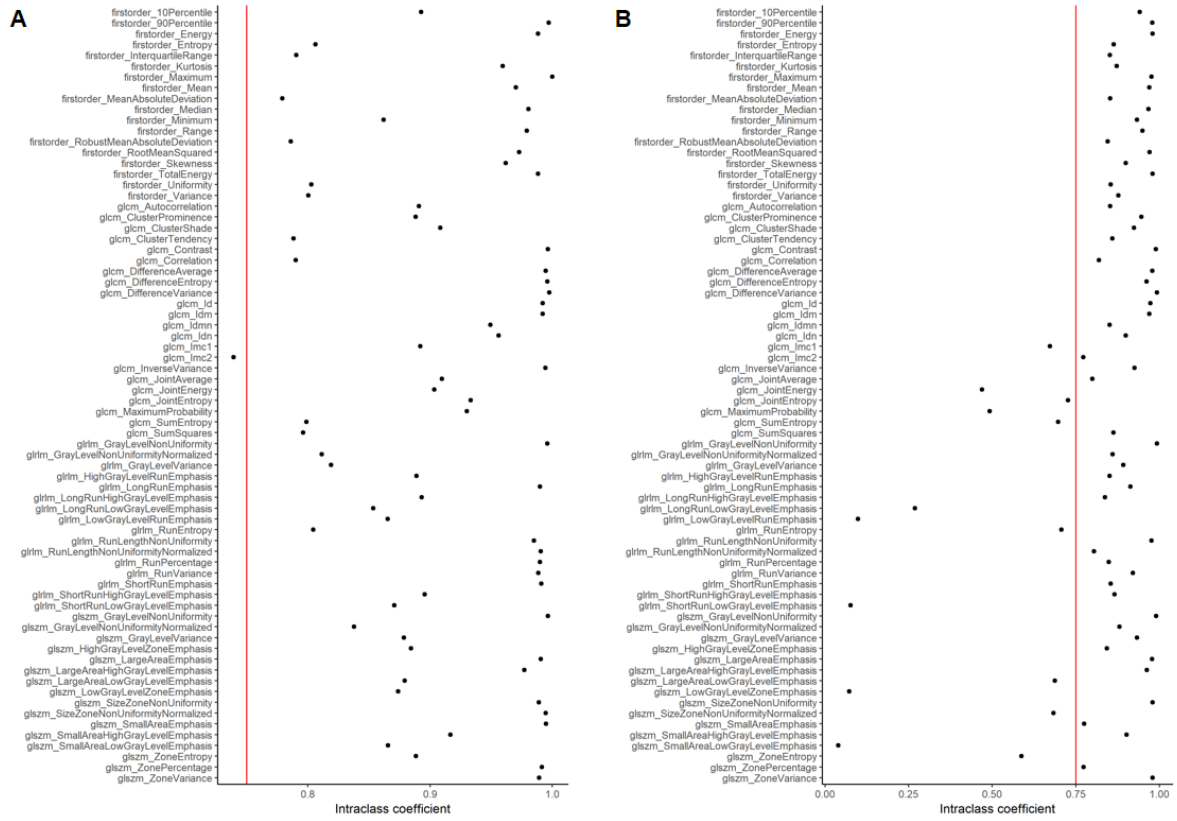

Supplement: 41598_2020_78681_MOESM1_ESM.pdf [file 41598_2020_78681_MOESM1_ESM.pdf]
